# Supplementary material for: Universal interventions for suicide prevention in high-income Organisation for Economic Co-operation and Development (OECD) member countries: a systematic review
Source: HighWire-hosted journal article supplement (doi:10.1136/injuryprev-2020-043975), 2021-01-22
Supplement: injuryprev-2020-043975supp001_data_supplement.pdf [file injuryprev-2020-043975supp001_data_supplement.pdf]

**Online Supplemental File 1: High-income OECD countries***25 European countries*

- Austria
- Belgium
- Czech Republic
- Denmark
- Estonia
- Finland
- France
- Germany
- Greece
- Hungary
- Iceland
- Ireland
- Italy
- Latvia
- Luxembourg
- Netherlands
- Norway
- Poland
- Portugal
- Slovakia
- Slovenia
- Spain
- Sweden
- Switzerland
- United Kingdom (England, Ireland, Wales, Scotland)

*3 Asian countries*

- Israel
- Japan
- South Korea

*3 Americas countries*

- Canada
- Chile
- United States

## *2 Oceania countries*

- Australia
- New Zealand

Note: Lithuania joined the OECD in 2018 and was not included in the original search strategy for this systematic review.
