# Supplementary material for: Universal interventions for suicide prevention in high-income Organisation for Economic Co-operation and Development (OECD) member countries: a systematic review
Source: HighWire-hosted journal article supplement (doi:10.1136/injuryprev-2020-043975), 2021-01-22
Supplement: injuryprev-2020-043975supp004_data_supplement.pdf [file injuryprev-2020-043975supp004_data_supplement.pdf]

## Online Supplemental File 4

Table 3. Community-based interventions

| Study                              | Design                       | Study time period | Country (region)          | Intervention                                                                                                                                                                                                                                                                                                    | Results                                                                                                                                                                                                                                                                                                                                                                                                                | Direction of association          |
|------------------------------------|------------------------------|-------------------|---------------------------|-----------------------------------------------------------------------------------------------------------------------------------------------------------------------------------------------------------------------------------------------------------------------------------------------------------------|------------------------------------------------------------------------------------------------------------------------------------------------------------------------------------------------------------------------------------------------------------------------------------------------------------------------------------------------------------------------------------------------------------------------|-----------------------------------|
| Lockley et al., 2014 <sup>S6</sup> | Time-series                  | 2001–2011         | Australia (Gap Park)      | In 2010, the Gap Park Masterplan was implemented to reduce mortality at a suicide hotspot. The Masterplan included restricting access to means by constructing a new fence, encouraging help through a newly installed crisis telephone and signs, and installed close-circuit televisions to monitor the site. | A trend toward increasing jumping-related suicide mortality was observed (2001-2011), however, it did not reach statistical significance (estimated annual percent change = 6.71%; 95% CI: -2.5%, 16.8%; $p = 0.14$ ).                                                                                                                                                                                                 | Total: +                          |
| Ross et al., 2020 <sup>S7</sup>    | Mixed Methods Study          | 2000–2016         | Australia (Gap Park)      | In 2010, the Gap Park Masterplan initiative implemented a series of suicide prevention measures, which included fencing, increased surveillance, protocols with police, prevention signs, and the installation of a crisis telephone.                                                                           | Following the intervention, there was a slight upward trend in suicide mortalities from 2000 to 2016 (annual percent change = 5.4%; 95% CI: -0.38%, 11.53%; $p = 0.07$ ). From 2010 to 2016, suicide mortality declined significantly for women (annual percent change = -21.27%; 95% CI: -33.14%, -7.30%; $p = 0.01$ ), but increased among men (annual percent change = 6.23%; 95% CI: -0.41%, 13.30%; $p = 0.06$ ). | Total: +<br>Male: +<br>Female: -- |
| Hegerl et al., 2019 <sup>S8</sup>  | Pre-post, with control group | 2008–2011         | Europe (Germany, Hungary, | In 2008, the Optimizing Suicide Prevention Programmes and Their Implementation in Europe project was implemented, which focused on                                                                                                                                                                              | The number of suicide mortalities increased from 138 at baseline to 163 (18.1% increase) in the two years following the onset of the intervention. This increase was not statistically                                                                                                                                                                                                                                 | Total: +                          |

|                                     |                              |           |                                               |                                                                                                                                                                                                                                                          |                                                                                                                                                                                                                                                |                                     |
|-------------------------------------|------------------------------|-----------|-----------------------------------------------|----------------------------------------------------------------------------------------------------------------------------------------------------------------------------------------------------------------------------------------------------------|------------------------------------------------------------------------------------------------------------------------------------------------------------------------------------------------------------------------------------------------|-------------------------------------|
|                                     |                              |           | Portugal, and Ireland)                        | four main interventions: (1) training of primary care providers, (2) a public awareness campaign, (3) training of community facilitators, and (4) support for patients and their relatives.                                                              | different from the control regions (OR = 0.93; 95% CI: 0.65, 1.33; $p = 0.68$ ).                                                                                                                                                               |                                     |
| Hegerl et al., 2006 <sup>S9</sup>   | Pre-post, with control group | 1992–2002 | Germany (Nuremberg; control group, Wuerzburg) | In 2001–02, a four-level community-based intervention was implemented to improve the care of patients with depression: (i) training of family doctors, (ii) media and general public campaigns, (iii) community facilitators, (iv) self-help activities. | During the first year of the intervention the number of suicide mortalities declined from 100 at baseline to 75 (-25%), and 89 (-11%) during the second year. There was no significant difference between the control and intervention groups. | Total: -                            |
| Hegerl et al., 2010 <sup>S10</sup>  | Pre-post, with control group | 1989–2006 | Germany (Nuremberg);                          | In 2001–02, a four-level community-based intervention was implemented to improve the care of patients with depression: (i) training of family doctors, (ii) media and general public campaigns, (iii) community facilitators, (iv) self-help activities. | Following the intervention the number of suicide mortalities were at their lowest levels since 1989 (2003: 88; 2004: 87; 2005: 68; 2006: 72), although the decline was not statistically significant.                                          | Total: -                            |
| Szekely et al., 2013 <sup>S11</sup> | Pre-post, with control group | 1998–2009 | Hungary (Szolnok; control group, Szeged)      | From 2004 to 2006, the European Alliance Against Depression intervention was implemented which included: (i) co-operation with general practitioners, (ii) public relations campaign, (iii)                                                              | Suicide rates declined during the two-year intervention (mean change -55.9%; $p < 0.01$ ), while no significant changes in suicide rates were observed in the control region (+2.0%).                                                          | Total: --<br>Male: --<br>Female: -- |

|                                       |                                      |           |                                         |                                                                                                                                                                                                                                                                                |                                                                                                                                                                                                                                                                                        |                                                                        |
|---------------------------------------|--------------------------------------|-----------|-----------------------------------------|--------------------------------------------------------------------------------------------------------------------------------------------------------------------------------------------------------------------------------------------------------------------------------|----------------------------------------------------------------------------------------------------------------------------------------------------------------------------------------------------------------------------------------------------------------------------------------|------------------------------------------------------------------------|
|                                       |                                      |           |                                         | community facilitators, and (iv) high risk groups and self-help.                                                                                                                                                                                                               |                                                                                                                                                                                                                                                                                        |                                                                        |
| Motohashi et al., 2007 <sup>S12</sup> | Quasi-experiment, with control group | 1999–2006 | Japan (Akita)                           | In 2001, a 3-year multi-component intervention was implemented that included awareness-raising activities, a mental health survey, specialist training in suicide prevention, resident engagement, compiled list of counselling centers, and community networking activities.  | There was a significant decrease in the suicide rate per 100,000 in the intervention group (70.8 pre-intervention [1999] to 34.1 post-intervention [2004], $p = 0.01$ ). There were no significant changes observed in the control group during the same time period.                  | Total: --                                                              |
| King and Frost, 2005 <sup>S13</sup>   | Retrospective design                 | 1988–2001 | United Kingdom (England, New Forest)    | From October 1998 to September 2001, the New Forest suicide prevention initiative was implemented by installing awareness signs in high-risk car parks, raising staff awareness, and providing support to those likely to come in contact with individuals at risk of suicide. | There was a large decrease in suicide mortality in New Forest from an average of 23.3 suicide mortalities per year pre-intervention to 18.7 per year during the intervention period.                                                                                                   | Total: -                                                               |
| Stack, 2015 <sup>S14</sup>            | Pre-post, no control group           | 1986–2012 | United States (St. Petersburg, Florida) | In 1999, a crisis phone line with signs to increase awareness were installed on the Skyway bridge in St. Petersburg.                                                                                                                                                           | The short-term two-year impact showed a non-significant average decline of five suicide mortalities when compared with the control. The long-term 13-year impact showed a significant increase in average suicide mortality of 4.5 suicide mortalities when compared with the control. | <i>2-year impact</i><br>Total: -<br><i>13-year impact</i><br>Total: ++ |

Note: CI = confidence interval; OR = odds ratio; - = not statistically significant reduction; -- = statistically significant reduction; + = not statistically significant increase; ++ = statistically significant increase
